# Supplementary material
Source: publisher figshare collection journal article supplement (https://geolsoc.figshare.com/articles/dataset/_/3453533)
Supplement: Supplementary file 2 [file 1]

# Origin and significance of intra- basement seismic reflections offshore western Norway

Matthew T. Reeve

Rebecca E. Bell

Christopher A-L. Jackson

*Department of Earth Science and Engineering, Imperial College, Prince Consort Road, South Kensington  
Campus, Imperial College, London, SW7 2BP, UK*

## Supplementary material S3

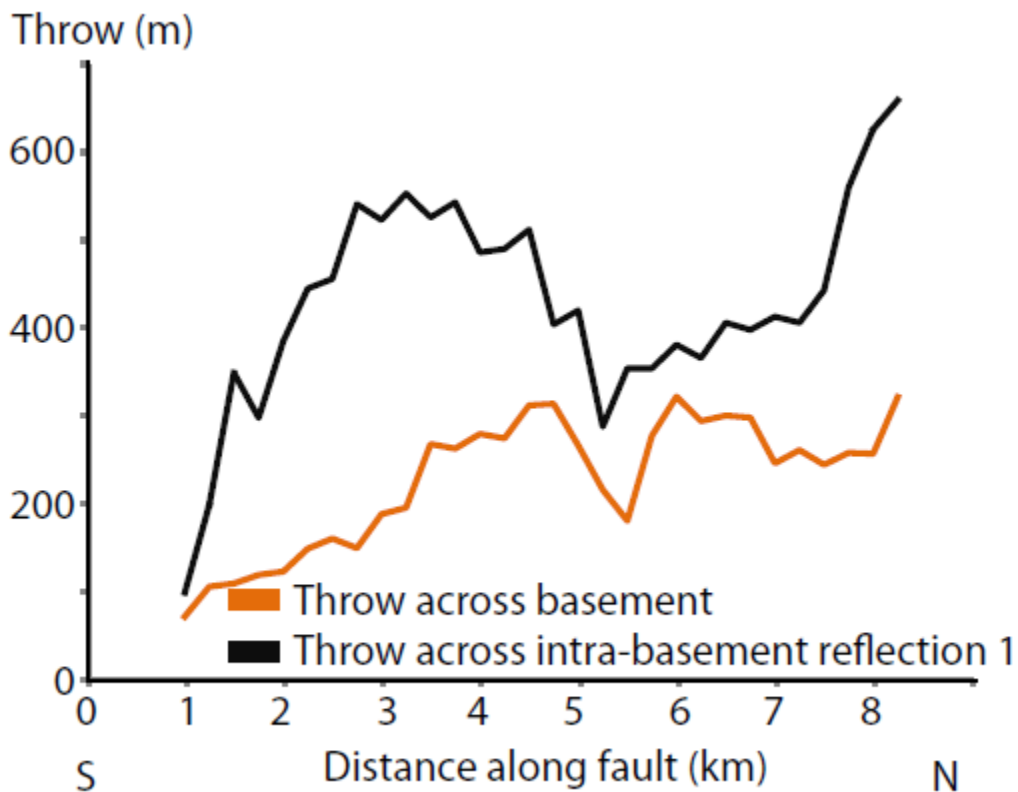

**Figure S3.** Throw vs. distance (T-x) plot for fault F1 at the structural levels of the basement reflection and intra-basement reflection 1 (see Fig. 1 for location of measurements).
